# Supplementary material for: Preparation and characterization of PbO2 electrodes from electro-deposition solutions with different copper concentration
Source: Royal Society of Chemistry journal article supplement (doi:10.1039/c4ra03235g), 2014-01-01
Supplement: c4ra03235g1.pdf [file c4ra03235g1.pdf]

## Supporting Information

### **Preparation and characterization of PbO<sub>2</sub> electrodes from electro-deposition solutions with different copper concentration**

Xu Hao<sup>1</sup>, Shao Dan<sup>1</sup>, Zhang Qian<sup>1</sup>, Yang Honghui<sup>1\*</sup>, Wei Yan<sup>1,2\*\*</sup>

<sup>1</sup>Department of Environmental Science and Engineering, Xi'an Jiaotong University, Xi'an, 710049, China

<sup>2</sup>The State Key Laboratory of Multiphase Flow in Power Engineering, Xi'an Jiaotong University, Xi'an, 710049, China

---

\* and \*\*: Corresponding author. Fax: +86-29-82664731

Email: [yanghonghui@mail.xjtu.edu.cn](mailto:yanghonghui@mail.xjtu.edu.cn) (H. H. Yang), [yanwei@mail.xjtu.edu.cn](mailto:yanwei@mail.xjtu.edu.cn) (W. Yan)

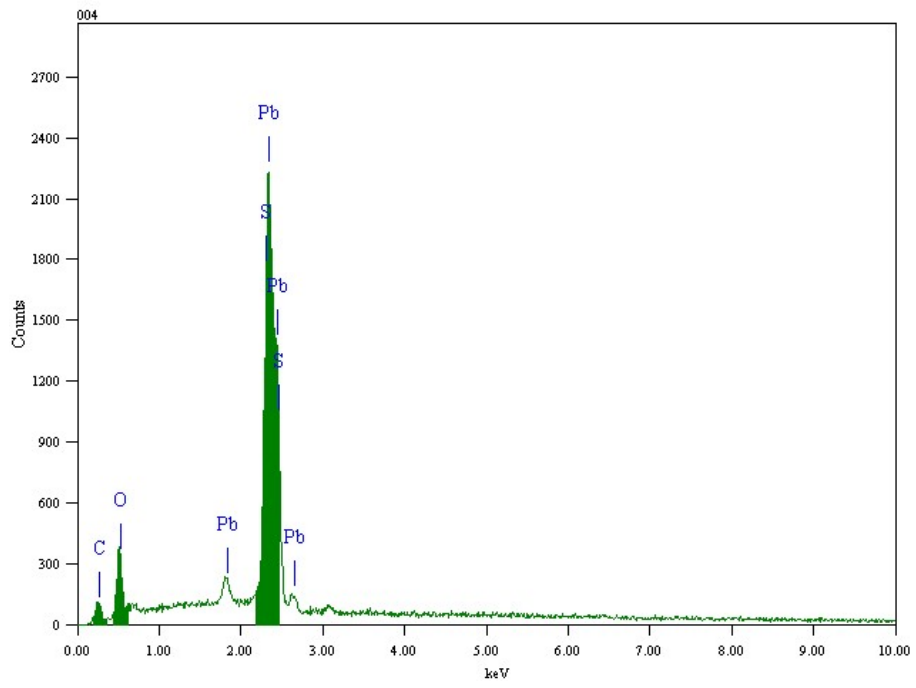

(a)

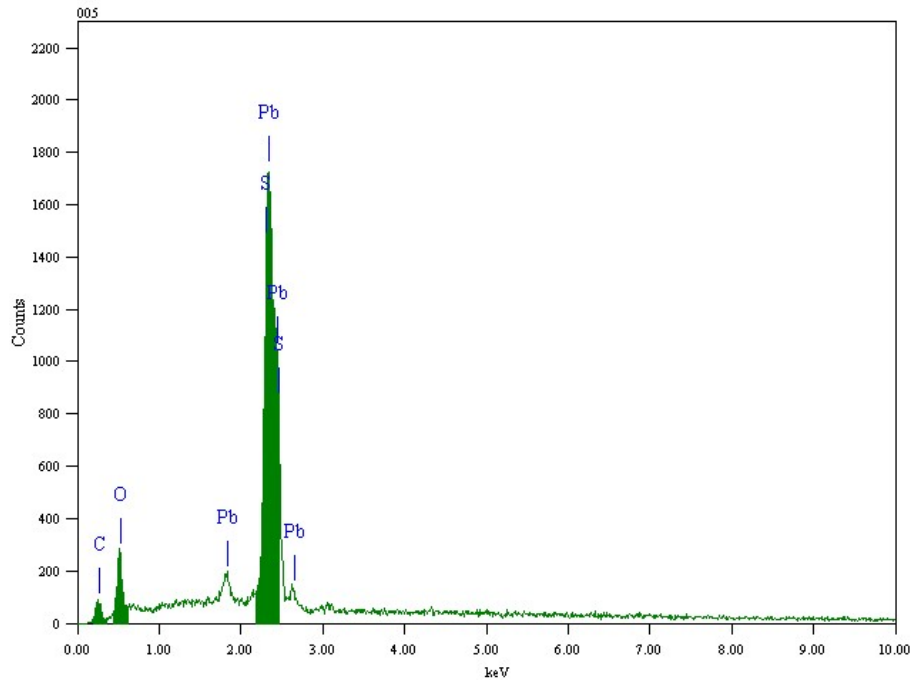

(b)

(c)

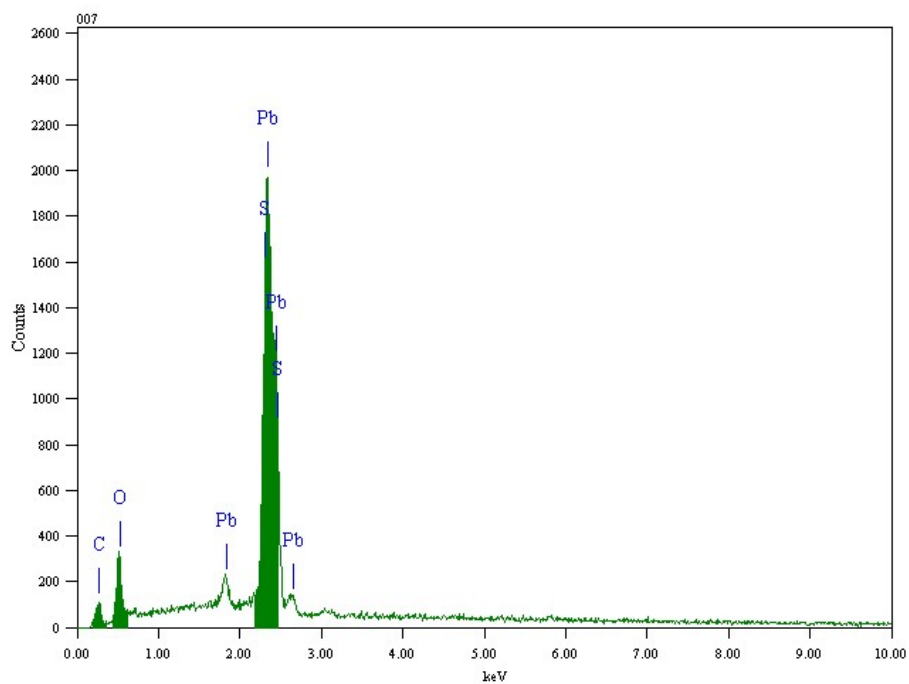

(c)

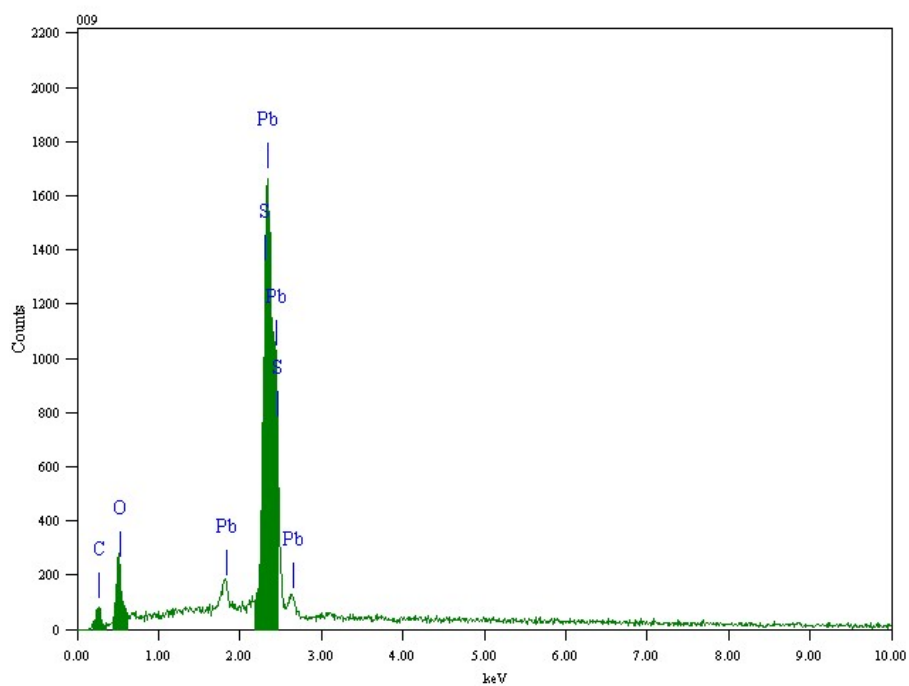

(d)

Fig. S1. EDS analysis of the  $\text{PbO}_2$  electrodes with different copper nitrate concentration (a:  $0 \text{ mol}\cdot\text{L}^{-1}$ , b:  $0.1 \text{ mol}\cdot\text{L}^{-1}$ , c:  $0.3 \text{ mol}\cdot\text{L}^{-1}$ , d:  $0.4 \text{ mol}\cdot\text{L}^{-1}$ )
